# Supplementary material for: Preparation of PEG materials for constructing complex structures by stereolithographic 3D printing
Source: Royal Society of Chemistry journal article supplement (doi:10.1039/c7ra04492e), 2017-01-01
Supplement: c7ra04492e1.pdf [file c7ra04492e1.pdf]

## **Supplementary Information**

### **Preparation of PEG Materials for Constructing Complex Structures by Stereolithographic 3D Printing**

Hyein Seo, Seong Gil Heo, Hyemin Lee and Hyunsik Yoon\*

Department of Chemical and Biomolecular Engineering, Seoul National University of Science & Technology, Seoul, 139-743, Korea

[\*] E-mail: [hsyoon@seoultech.ac.kr](mailto:hsyoon@seoultech.ac.kr)

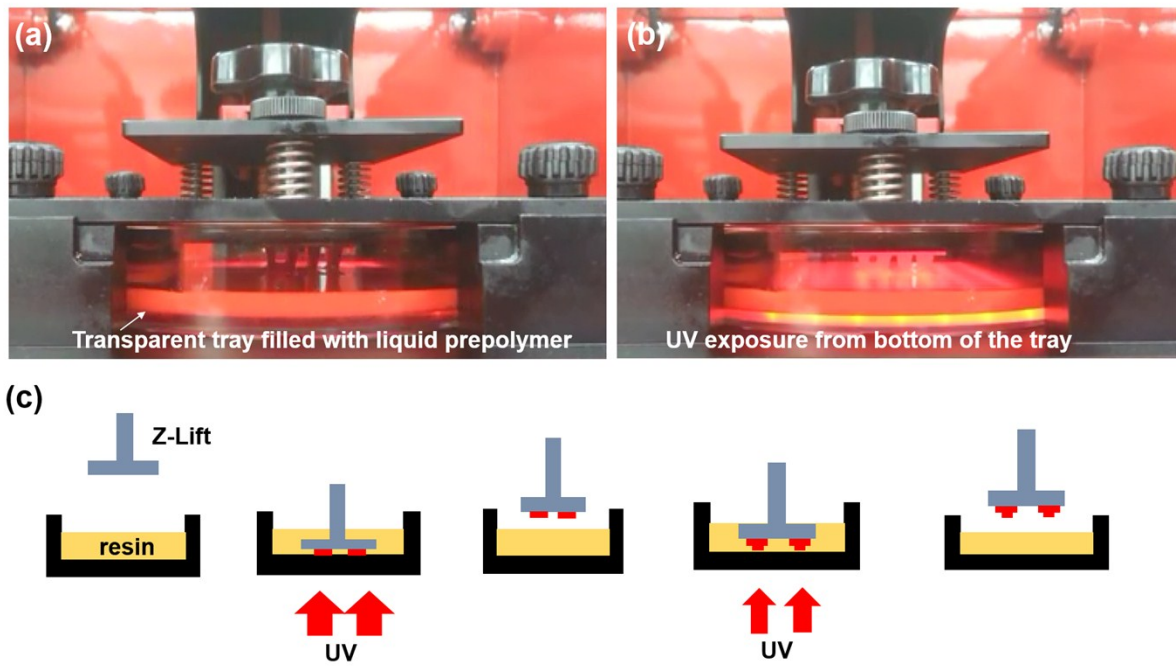

**Fig. S1.** Images of the 3D Printer used in experiment (a) before and (b) after UV exposure. (c) Schematic illustration of the 3D printing operation.

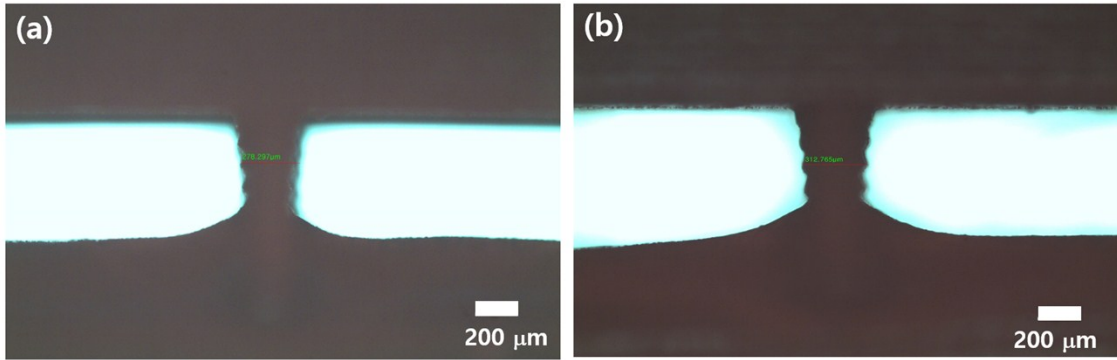

**Fig. S2.** Microscopic images of the 3D Printed structures (a) before and (b) after swelling in water.
